# Supplementary material for: Efficient extraction of slowly-released Cr(vi) from nano-sized ion channels in Cr(vi)–ettringite from reduced chromite ore processing residue
Source: Royal Society of Chemistry journal article supplement (doi:10.1039/d0en00074d), 2020-01-01
Supplement: d0en00074d1.pdf [file d0en00074d1.pdf]

## **Supporting Information**

### **Efficient Extraction of Slow-releasing Cr(VI) from Nano-sized Ion Channels in Cr(VI)–Ettringite from Reduced Chromite Ore Processing Residue**

Weizhen Liu,<sup>a§</sup> Yao Song,<sup>a§</sup> Jing Li,<sup>a</sup> Lan Ling,<sup>b</sup> Chen Tian,<sup>a</sup> Xueming Liu,<sup>a</sup>  
Zhang Lin<sup>\*a</sup>

<sup>a</sup> School of Environment and Energy, The Key Laboratory of Pollution Control and Ecosystem Restoration in Industry Clusters (Ministry of Education), South China University of Technology, Guangzhou 510006, China

<sup>b</sup> State Key Laboratory for Pollution Control, School of Environmental Science and Engineering, Tongji University, 1239 Siping Road, Shanghai 200092, China

\* Corresponding author: Tel: 86-020-39380503; E-mail: [zlin@scut.edu.cn](mailto:zlin@scut.edu.cn)

<sup>§</sup> These authors contributed equally to this work.

**Table S1.** The content of main elements in the pristine rCOPR was tested by XRF.

|                      | Cr   | Ca   | Mg   | Al  | Fe   | Na    | S   | Ref.      |
|----------------------|------|------|------|-----|------|-------|-----|-----------|
| rCOPR                | 8.9  | 39.2 | 24.8 | 5.9 | 13.5 | 0.075 | 2.0 | this work |
| Lime-based<br>COPR-1 | 1.8  | 23.7 | 13.8 | 4.4 | 5.1  | 2.2   | 1.1 | [1]       |
| Lime-based<br>COPR-2 | 2.33 | 20.6 | 4.6  | 5.5 | 12.5 | \     | \   | [2]       |

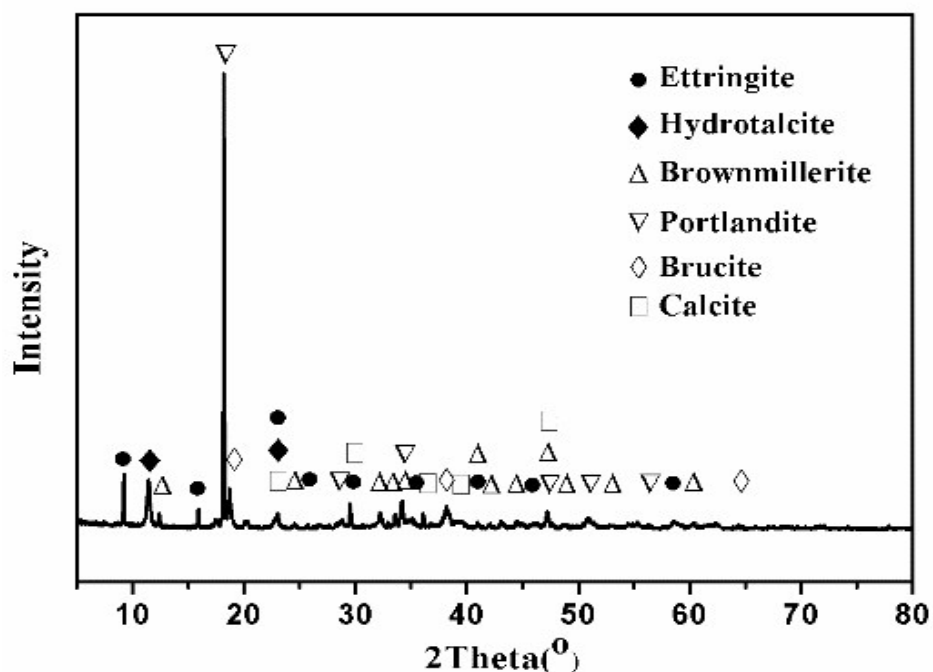

**Figure S1.** XRD pattern of the pristine rCOPR.[3]

Ettringite:  $\text{Ca}_6\text{Al}_2(\text{SO}_4)_3(\text{OH})_{12} \cdot 26\text{H}_2\text{O}$  (pdf:00-041-1451)

Hydrotalcite:  $\text{Mg}_6\text{Al}_2\text{CO}_3(\text{OH})_{16} \cdot 4\text{H}_2\text{O}$  (pdf:01-087-1138)

Brownmillerite:  $\text{Ca}_2\text{FeAlO}_5$  (pdf:01-070-2764)

Portlandite:  $\text{Ca}(\text{OH})_2$  (pdf:01-084-1264 )

Brucite:  $\text{Mg}(\text{OH})_2$  (pdf:01-084-2164)

Calcite:  $\text{CaCO}_3$  (pdf:01-072-1651)

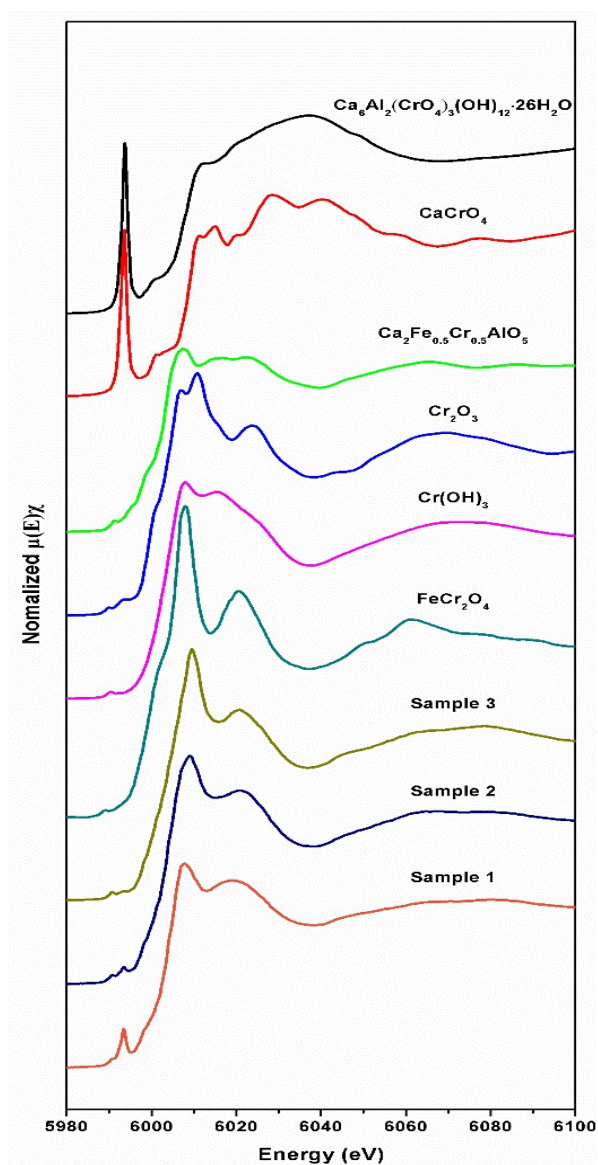

**Figure S2.** Cr *K*-edge XAFS spectra of the samples and reference compounds. Sample 1, 2, 3 refer to the pristine COPR, the treated COPR by using 1M NaHCO<sub>3</sub> under room temperature, and the treated COPR by using 1 M NaHCO<sub>3</sub> under hydrothermal conditions, respectively.

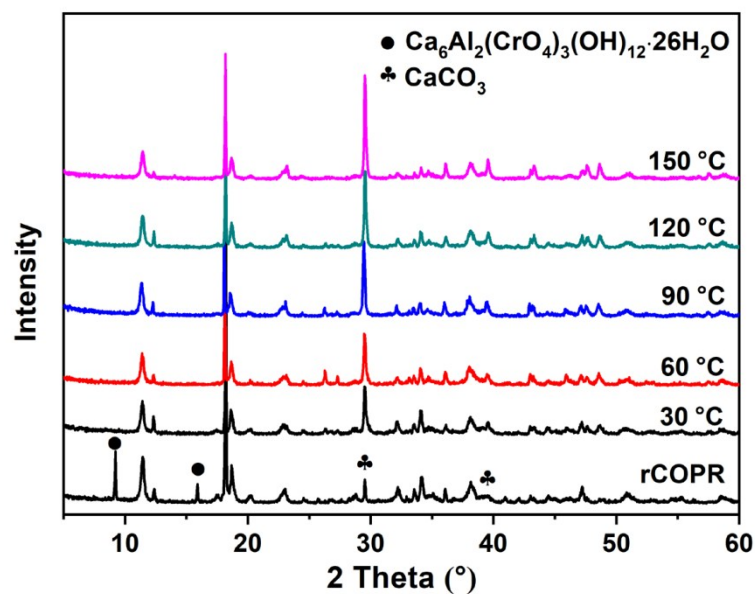

**Figure S3.** a) XRD pattern of the treated COPR with different hydrothermal temperature from 30-150 °C (1 M NaHCO<sub>3</sub>, hydrothermal time = 3 h.)

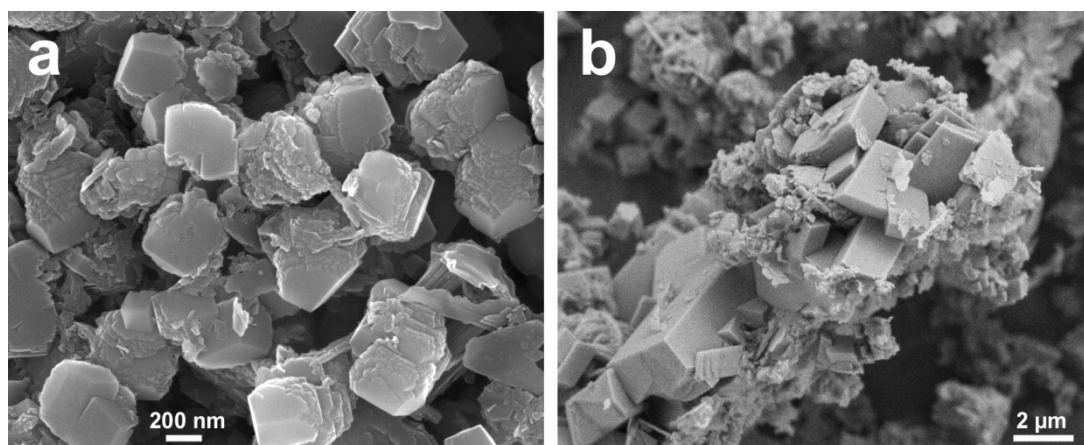

**Figure S4.** SEM images of CaCO<sub>3</sub> in treated COPR with 1M NaHCO<sub>3</sub>: a) without hydrothermal treatment. b) with hydrothermal treatment at 120 °C for 3 h.

**Table S2.** The pH of solution as a function of NaHCO<sub>3</sub> concentration.

| NaHCO <sub>3</sub> concentration (mol/L) | 0.05  | 0.1   | 0.2   | 0.5   | 1    | 2    |
|------------------------------------------|-------|-------|-------|-------|------|------|
| pH                                       | 12.09 | 12.47 | 10.60 | 10.09 | 9.89 | 9.74 |

**Table S3.** The pH of the solution as a function of hydrothermal temperature and hydrothermal time.

| Hydrothermal temperature (°C) | 30   | 60   | 90   | 120  | 150  |
|-------------------------------|------|------|------|------|------|
| pH                            | 9.89 | 9.64 | 9.55 | 9.61 | 9.78 |
| Hydrothermal time (h)         | 0.5  | 1    | 2    | 3    | 4    |
| pH                            | 9.46 | 9.49 | 9.53 | 9.61 | 9.82 |

## References

- [1] X. Wang, J. Zhang, L. Wang, J. Chen, H. Hou and J. Yang, Long-term stability of FeSO<sub>4</sub> and H<sub>2</sub>SO<sub>4</sub> treated chromite ore processing residue (COPR): Importance of H<sup>+</sup> and SO<sub>4</sub><sup>2-</sup>. *J. Hazard Mater*, 2017, **321**, 720-727.
- [2] M. Chrysochoou, S. C. Fakra, M. A. Marcus, D. H. Moon and D. Dermatas, Microstructural Analyses of Cr(VI) Speciation in Chromite Ore Processing Residue (COPR). *Environ Sci Technol*, 2009, **43**, 5461-5466.
- [3] Y. Song, J. Li, M. Peng, Z. Deng, J. Yang and W. Liu, Identification of Cr(VI) speciation in ferrous sulfate-reduced chromite ore processing residue (rCOPR) and impacts of environmental factors erosion on Cr(VI) leaching. *J. Hazard Mater*, 2019, **373**, 389-396.
